# Supplementary material for: New Insights into Endogenous Retrovirus-K Transcripts in Amyotrophic Lateral Sclerosis
Source: MDPI journal article supplement (doi:10.3390/ijms25031549), 2024-01-26
Supplement: s1 [file s1]

# New Insights into Endogenous Retrovirus-K Transcripts in Amyotrophic Lateral Sclerosis

Laura Moreno-Martinez <sup>1,2,3,4,†</sup>, Sofía Macías-Redondo <sup>5,†,‡</sup>, Mark Strunk <sup>5</sup>, María Isabel Guillén-Antonini <sup>3</sup>, Christian Lunetta <sup>6,7,8</sup>, Claudia Tarlarini <sup>8</sup>, Silvana Penco <sup>8</sup>, Ana Cristina Calvo <sup>1,2,3,4</sup>, Rosario Osta <sup>1,2,3,4</sup> and Jon Schoorlemmer <sup>3,5,9,\*</sup>

<sup>1</sup> Laboratory of Genetics and Biochemistry (LAGENBIO), Faculty of Veterinary, University of Zaragoza, Miguel Servet 177, 50013 Zaragoza, Spain; lauramm@unizar.es (L.M.-M.); osta@unizar.es (R.O.)

<sup>2</sup> Centro de Investigación Biomédica en Red en Enfermedades Neurodegenerativas, Instituto de Salud Carlos III (CIBER-CIBERNED-ISCIII), 28029 Madrid, Spain

<sup>3</sup> Instituto de Investigación Sanitaria Aragón (IIS Aragón), 50009 Zaragoza, Spain

<sup>4</sup> Instituto Agroalimentario de Aragón (IA2), University of Zaragoza-CITA, C/Miguel, Servet 177, 50013 Zaragoza, Spain

<sup>5</sup> Instituto Aragonés de Ciencias de la Salud (IACS), Centro de Investigación Biomédica de Aragón (CIBA), 50009 Zaragoza, Spain; smacias@certest.es (S.M.-R.)

<sup>6</sup> NEMO (NEuroMuscular Omnicentre) Clinical Center, Fondazione Serena Onlus, 20162 Milan, Italy

<sup>7</sup> Neurorehabilitation Department of Milano Institute, Istituti Clinici Scientifici Maugeri IRCCS, 20138 Milan, Italy

<sup>8</sup> Medical Genetics Unit, Department of Laboratory Medicine, ASST Grande Ospedale Metropolitano Niguarda, 20162 Milan, Italy; claudia.tarlarini@ospedaleniguarda.it (C.T.)

<sup>9</sup> ARAID Foundation, 50009 Zaragoza, Spain

\* Correspondence: jonas@araid.es

† These authors contributed equally to this work.

‡ Current address: Certest Biotec, 50840 Zaragoza, Spain.

## Supplementary figures

A

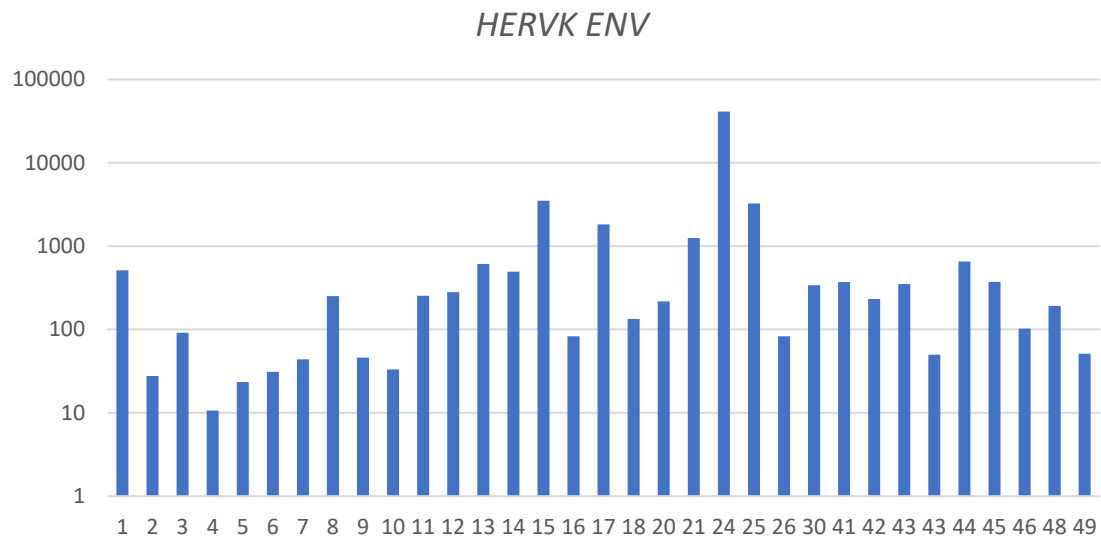

B

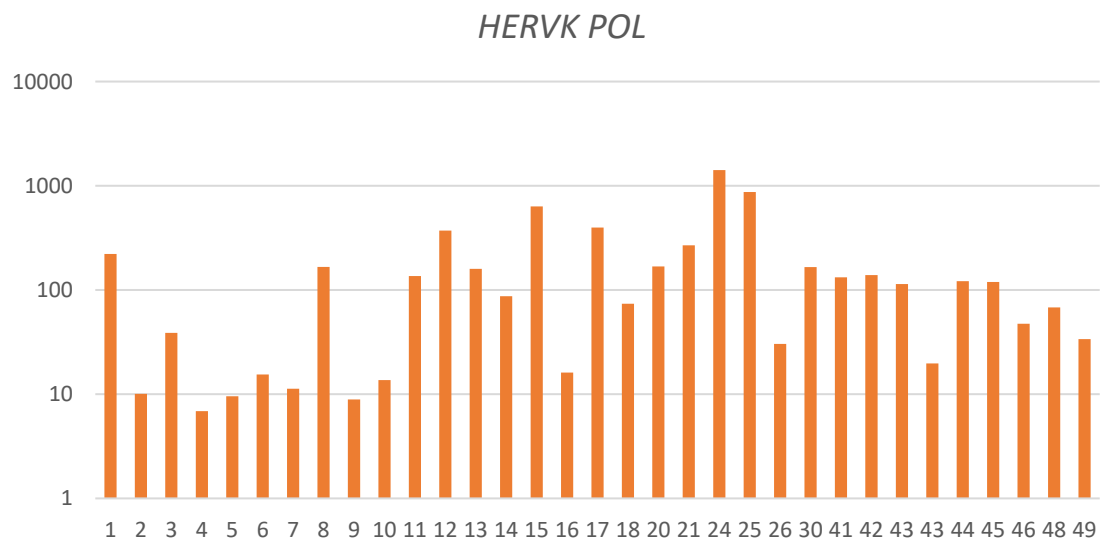

**Figure S1.** Analysis of amplification as a function of RT activity. RNA samples (n=33) were reverse transcribed with or without enzyme (the latter indicated as mock). Resulting templates were used to amplify either *HERVK ENV* (A) or *POL* (B) genes by qPCR, the results of which were registered as Ct values. The difference between the two conditions was calculated ( $\Delta$ Ct) and recalculated as fold change. The figure shows the fold change calculated between the conditions (+/-) RTase for each sample (X axis) represented on a logarithmic scale (Y axis).

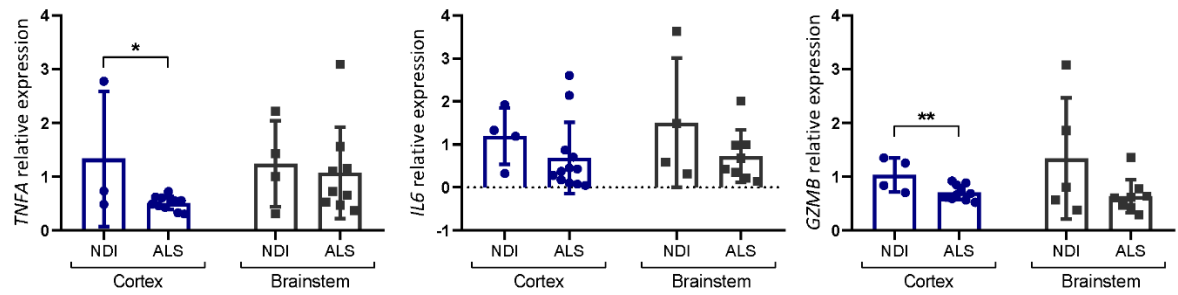

**Figure S2.** Inflammation-related gene expression in ALS brain. Expression analysis of the genes indicated was carried out by qPCR on cDNA samples prepared from brain samples of ALS patients and controls (NDI). Results were normalized using *GAPDH* and *RPL19* as reference genes, calculated using the  $2^{-\Delta\Delta C_t}$  method, and represented as the fold expression compared to the mean expression level in controls. ALS patient samples as well as control (NDI) samples were prepared from either cerebral cortex or brainstem. Cortex ALS n= 10; Cortex NDI n=3; Brainstem ALS n=9; Brainstem NDI n=4. t-student; \* p < 0.05, \*\* p < 0.01.

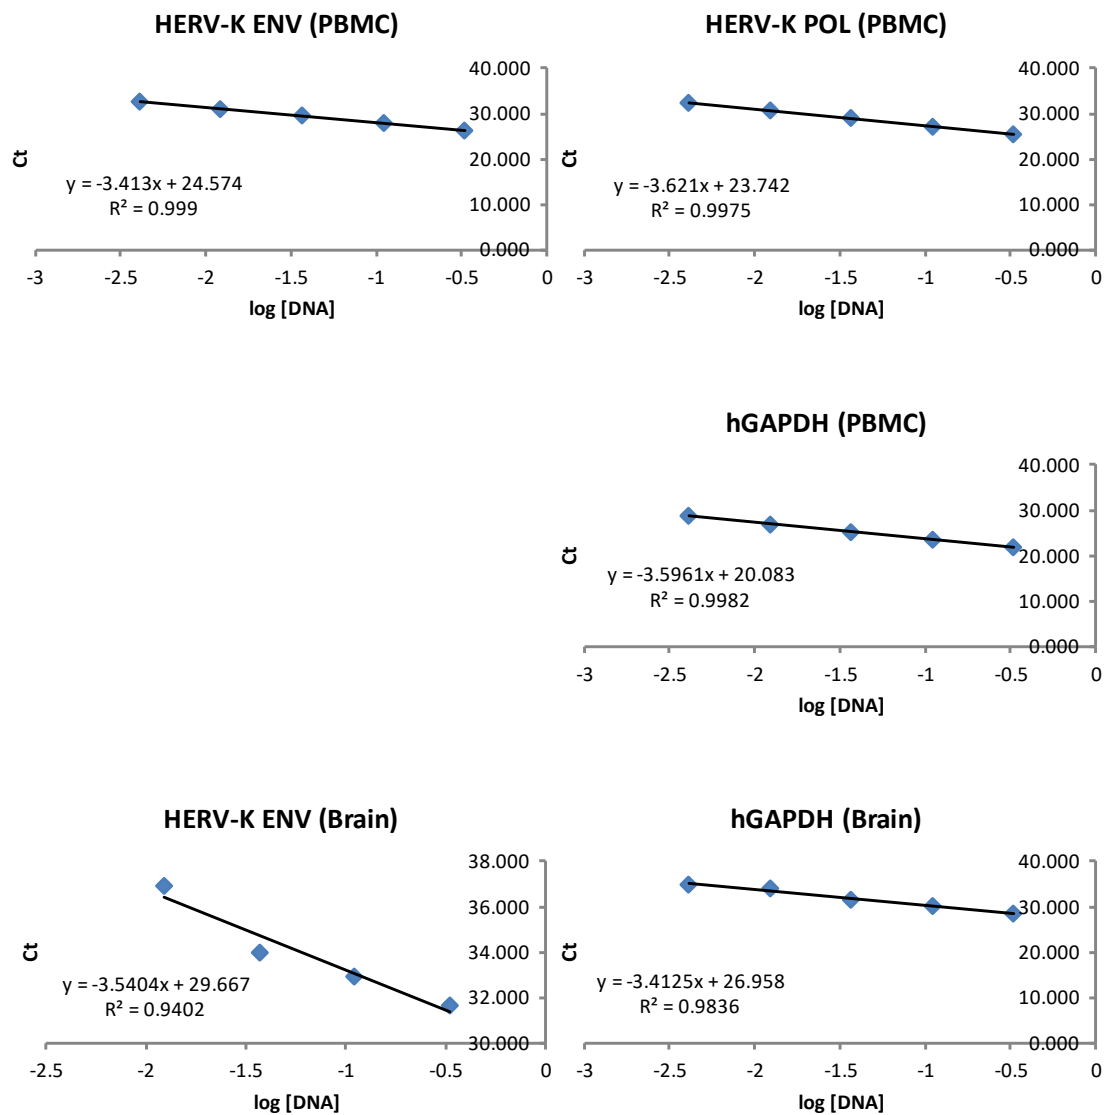

**Figure S3.** Linear standard curves for *HERVK* qPCR. Expression analysis of Human endogenous retrovirus *ENV*, *POL* genes or human *GAPDH* was carried out as described in the Materials and Methods section and the legend to Figure 1, using the indicated templates: a random PBMC sample, a brain sample with an about average RQI.

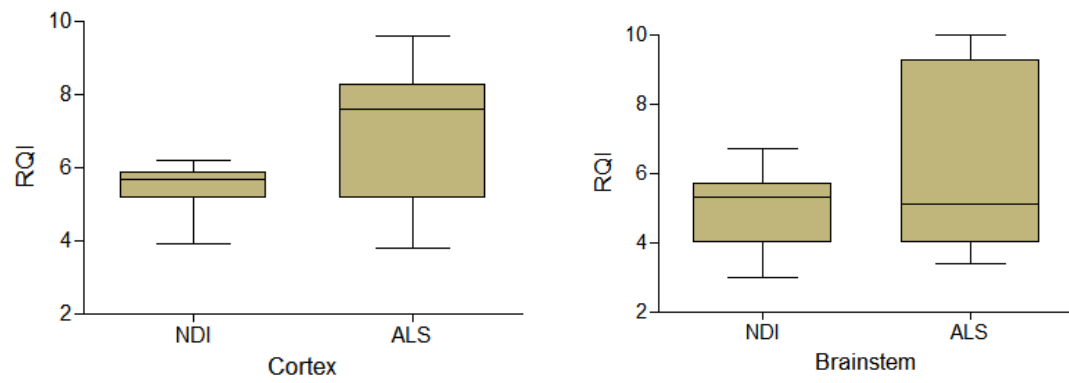

**Figure S4.** Mean RNA quality indicator (RQI) values for RNA of post-mortem brain samples in the different groups are 6.90 (ALS Cortex), 6.08 (ALS Brainstem), 5.45 (NDI Cortex) and 4.96 (NDI Brainstem). No statistical differences were encountered between ALS patients and NDI groups,  $p=0.298$  and  $0.064$  (Mann-Whitney U test) for brainstem and cortex, respectively.

## Supplementary tables

**Table S1.** Total reads per individual sample.

|             | Sample | Total reads |
|-------------|--------|-------------|
| Cortex ALS  | 1      | 123803      |
|             | 2      | 115687      |
|             | 3      | 75918       |
|             | 4      | 61477       |
|             | 5      | 69297       |
| Medulla ALS | 6      | 102465      |
|             | 7      | 106010      |
|             | 8      | 95167       |
|             | 9      | 123586      |
|             | 10     | 89224       |
| Cortex NDI  | 11     | 132295      |
|             | 12     | 82548       |
|             | 13     | 108058      |
|             | 14     | 52193       |
| Medulla NDI | 15     | 96001       |
|             | 16     | 89805       |
|             | 17     | 64168       |
|             | 18     | 60450       |
| PBMC NDI    | 19     | 43876       |
|             | 20     | 136704      |
|             | 21     | 76004       |
|             | 22     | 75899       |
|             | 23     | 52772       |
|             | 24     | 62607       |
|             | 25     | 112805      |
|             | 26     | 106904      |
|             | 27     | 54612       |
|             | 28     | 61610       |
| PBMC ALS    | 29     | 25286       |
|             | 30     | 67880       |
|             | 31     | 59762       |
|             | 32     | 77411       |
|             | 33     | 70704       |
|             | 34     | 54782       |
|             | 35     | 77230       |
|             | 36     | 67173       |
|             | 37     | 56448       |
|             | 38     | 73413       |

**Table S2.** Nomenclature and genomic localization of HERVK (HML-2) copies analyzed.

| Region indicator used | Nomenclature<br>(Subramanian) | Locus GRch 38.92          | Human specific |
|-----------------------|-------------------------------|---------------------------|----------------|
| HERV-K_copy_chr1-1    | 1p31.1                        | chr1:75382167-75382531    | Yes            |
| HERV-K_copy_chr1-2    | 1q22                          | chr1:155627592-155627956  | Yes            |
| HERV-K_copy_chr1-3    | 1q23.3                        | chr1:160698725-160699089  |                |
| HERV-K_copy_chr1-4    | 1q32.2                        | chr1:207636028-207636392  |                |
| HERV-K_copy_chr2      | 2q21.1                        | chr2:129962884-129963248  | Yes            |
| HERV-K_copy_chr3-1    | 3p25.3                        | chr3:9848603-9848969      |                |
| HERV-K_copy_chr3-2    | 3q12.3                        | chr3:101699723-101700087  |                |
| HERV-K_copy_chr3-3    | 3q13.2                        | chr3:113025195-113025559  | Yes            |
| HERV-K_copy_chr3-4    | 3q21.2                        | chr3:125898474-125898833  | Yes            |
| HERV-K_copy_chr3-5    | 3q27.2                        | chr3:185563474-185563838  | Yes            |
| HERV-K_copy_chr5-1    | 5p13.3                        | chr5:30487571-30487935    |                |
| HERV-K_copy_chr5-2    | 5q33.3                        | chr5:156658632-156658996  | Yes            |
| HERV-K_copy_chr6      | 6q14.1                        | chr6:77717863-77718227    | Yes            |
| HERV-K_copy_chr7-1    | 7p22.1a                       | chr7:4583352-4583716      | Yes            |
| HERV-K_copy_chr7-2    | 7p22.1b                       | chr7:4591856-4592220      | Yes            |
| HERV-K_copy_chr8-1    | 8p23.1a                       | chr8:7498801-7499165      | Yes            |
| HERV-K_copy_chr8-2    | 8q24.3a                       | chr8:139460832-139461196  | Yes            |
| HERV-K_copy_chr10     | 10p14                         | chr10:6825105-6825469     |                |
| HERV-K_copy_chr11-1   | 11q22.1                       | chr11:101703237-101703601 | Yes            |
| HERV-K_copy_chr11-2   | 11q23.3                       | chr11:118721940-118722304 |                |
| HERV-K_copy_chr12     | 12q14.1                       | chr12:58328385-58328749   | Yes            |
| HERV-K_copy_chr16-1   | *                             | chr16:34412975-34413339   |                |
| HERV-K_copy_chr16-2   | 16p11.2                       | chr16:34998490-34998854   | Unknown        |
| HERV-K_copy_chr19-1   | 19p12c                        | chr19:22580468-22580832   |                |
| HERV-K_copy_chr19-2   | 19q11                         | chr19:27638543-27638907   | Yes            |
| HERV-K_copy_chr19-3   | 19q13.12a                     | chr19:35572396-35572760   |                |
| HERV-K_copy_chr22     | 22q11.21                      | chr22:18946561-18946925   | Yes            |

The first column lists the abbreviated code for different copies throughout this study. Codes suggested in Subramian et al., 2011 [20] are listed in the second column (\* indicates not listed), and are based on chromosome band location in the human genome. Genomic localization (GRch 38.92 version of the *Homo sapiens* genome) is represented in the third column and uniqueness to the human genome is also indicated (again based on Subramian et al., 2011 [20]).

**Table S5.** List of set of primers used for the qPCR expression analysis.

| Target                                | Sequence (5'-3')                                       | 1 mM MgCl <sub>2</sub> addition |
|---------------------------------------|--------------------------------------------------------|---------------------------------|
| HERVK <i>ENV</i><br>(Li et al., 2015) | For: CTGAGGCAATTGCAGGAGTT<br>Rev: GCTGTCTCTTCGGAGCTGTT | No                              |
| HERVK <i>POL</i><br>(Li et al., 2015) | For: TCACATGGAAACAGGCAAAA<br>Rev: AGGTACATGCGTGACATCCA | No                              |
| <i>GRANZYME B</i>                     | For: GACAGCTGCTCACTGTTGGG<br>Rev: ATAGGCTGGATGGGGGATGG | No                              |
| <i>hGAPDH</i>                         | For: ATCAGCAATGCCTCCTGCAC<br>Rev: TGGCATGGACTGTGGTCATG | No                              |

The first column shows the gene target, the second column indicates the primer sequences (5'-3'; For= forward; Rev= reverse) and the third column points out whether reactions were supplemented with 1 mM MgCl<sub>2</sub> or not.
